# Supplementary material for: Exposure to Green, Blue and Historic Environments and Mental Well-Being: A Comparison between Virtual Reality Head-Mounted Display and Flat Screen Exposure
Source: MDPI journal article supplement (doi:10.3390/ijerph19159457), 2022-08-02
Supplement: s1 [file s1]

## Supplementary Materials

Table S1: Mean (SD) theta activity

|                 |    | Overall Frontal | Overall Occipital | Medial Frontal | Lateral Frontal | Left Frontal | Right Frontal |
|-----------------|----|-----------------|-------------------|----------------|-----------------|--------------|---------------|
| <b>Green</b>    | FS | 1.75(0.63)      | 1.39(0.72)        | 1.01(0.34)     | 3.07(1.65)      | 2.25(1.19)   | 1.83(0.78)    |
|                 | VR | 3.07(1.25)      | 1.72(1.13)        | 1.82(1.31)     | 4.79(1.97)      | 3.33(1.36)   | 3.28(1.78)    |
| <b>Blue</b>     | FS | 1.85(0.95)      | 1.19(0.67)        | 1.19(0.71)     | 3.22(2.26)      | 2.37(1.43)   | 2.03(1.34)    |
|                 | VR | 3.00(0.96)      | 1.70(1.62)        | 2.02(1.71)     | 5.20(1.92)      | 4.22(1.87)   | 3.00(1.17)    |
| <b>Historic</b> | FS | 1.89(0.71)      | 1.62(1.07)        | 1.11(0.45)     | 3.61(1.64)      | 2.50(1.21)   | 2.22(0.79)    |
|                 | VR | 3.84(1.47)      | 2.53(2.35)        | 2.22(1.99)     | 6.15(3.27)      | 4.11(1.44)   | 4.25(2.19)    |
| <b>Traffic</b>  | FS | 2.29(0.78)      | 1.72(0.86)        | 1.29(0.68)     | 3.80(1.42)      | 2.73(1.02)   | 2.37(1.00)    |

Table S2: Mean (SD) alpha activity

|                 |    | Overall Frontal | Overall Occipital | Medial Frontal | Lateral Frontal | Left Frontal | Right Frontal |
|-----------------|----|-----------------|-------------------|----------------|-----------------|--------------|---------------|
| <b>Green</b>    | FS | 0.78(0.38)      | 0.99(0.50)        | 0.61(0.31)     | 1.14(0.73)      | 1.03(0.77)   | 0.72(0.29)    |
|                 | VR | 1.19(0.57)      | 1.25(0.59)        | 0.74(0.38)     | 1.53(0.59)      | 1.18(0.43)   | 1.09(0.47)    |
| <b>Blue</b>     | FS | 0.80(0.52)      | 1.12(1.00)        | 0.78(0.46)     | 1.26(0.88)      | 1.19(0.68)   | 0.79(0.45)    |
|                 | VR | 1.17(0.54)      | 1.38(0.76)        | 0.79(0.38)     | 1.60(0.65)      | 1.27(0.45)   | 1.12(0.51)    |
| <b>Historic</b> | FS | 0.76(0.43)      | 1.40(1.04)        | 0.64(0.41)     | 1.11(0.59)      | 0.95(0.61)   | 0.80(0.37)    |
|                 | VR | 1.31(0.67)      | 1.28(0.65)        | 0.85(0.56)     | 1.72(0.71)      | 1.34(0.56)   | 1.22(0.66)    |
| <b>Traffic</b>  | FS | 1.08(0.56)      | 1.11(0.64)        | 0.72(0.45)     | 1.43(0.63)      | 1.15(0.55)   | 1.42(0.59)    |

Table S3: Mean (SD) beta activity

|                 |    | <b>Overall Frontal</b> | <b>Overall Occipital</b> | <b>Medial Frontal</b> | <b>Lateral Frontal</b> | <b>Left Frontal</b> | <b>Right Frontal</b> |
|-----------------|----|------------------------|--------------------------|-----------------------|------------------------|---------------------|----------------------|
| <b>Green</b>    | FS | 0.47(3.18)             | 0.41(0.31)               | 0.39(0.33)            | 0.59(0.51)             | 0.49(0.40)          | 0.50(0.50)           |
|                 | VR | 1.00(0.80)             | 0.86(0.71)               | 0.80(0.86)            | 1.07(0.91)             | 0.95(0.89)          | 0.92(0.79)           |
| <b>Blue</b>     | FS | 0.81(1.24)             | 0.71(1.06)               | 0.68(1.37)            | 0.85(1.39)             | 0.85(1.58)          | 0.68(1.19)           |
|                 | VR | 0.76(0.48)             | 0.70(0.46)               | 0.60(0.58)            | 0.83(0.44)             | 0.75(0.54)          | 0.68(0.35)           |
| <b>Historic</b> | FS | 0.54(0.77)             | 0.63(0.79)               | 0.49(0.79)            | 0.67(0.79)             | 0.55(0.76)          | 0.61(0.80)           |
|                 | VR | 0.91(0.49)             | 0.78(0.40)               | 0.69(0.52)            | 0.96(0.57)             | 0.86(0.52)          | 0.80(0.42)           |
| <b>Traffic</b>  | FS | 0.58(0.59)             | 0.57(0.84)               | 0.44(0.60)            | 0.74(0.69)             | 0.62(0.63)          | 0.56(0.62)           |

Table S4: Mean (SD) gamma activity

|                 |    | <b>Overall Frontal</b> | <b>Overall Occipital</b> | <b>Medial Frontal</b> | <b>Lateral Frontal</b> | <b>Left Frontal</b> | <b>Right Frontal</b> |
|-----------------|----|------------------------|--------------------------|-----------------------|------------------------|---------------------|----------------------|
| <b>Green</b>    | FS | 0.32(0.36)             | 0.26(0.48)               | 0.20(0.26)            | 0.58(1.00)             | 0.37(0.70)          | 0.42(0.93)           |
|                 | VR | 0.58(0.36)             | 0.48(0.47)               | 0.38(0.27)            | 0.68(0.43)             | 0.49(0.36)          | 0.57(0.33)           |
| <b>Blue</b>     | FS | 0.34(0.50)             | 0.26(0.39)               | 0.18(0.29)            | 0.30(0.30)             | 0.24(0.34)          | 0.24(0.26)           |
|                 | VR | 0.50(0.34)             | 0.47(0.53)               | 0.32(0.21)            | 0.66(0.46)             | 0.51(0.39)          | 0.48(0.23)           |
| <b>Historic</b> | FS | 0.26(0.26)             | 0.25(0.33)               | 0.17(0.20)            | 0.49(0.59)             | 0.30(0.28)          | 0.36(0.47)           |
|                 | VR | 0.65(0.39)             | 0.55(0.47)               | 0.45(0.28)            | 0.73(0.49)             | 0.56(0.40)          | 0.62(0.32)           |
| <b>Traffic</b>  | FS | 0.35(0.37)             | 0.31(0.68)               | 0.20(0.26)            | 0.67(0.95)             | 0.45(0.70)          | 0.41(0.58)           |
